# Supplementary material for: Stress and Strain Provide Positional and Directional Cues in Development
Source: PubMed Central journal article supplement (PMC3886884; doi:10.1371/journal.pcbi.1003410), 2014-01-09
Supplement: pcbi.1003410.s002.pdf [file pcbi.1003410.s002.pdf]

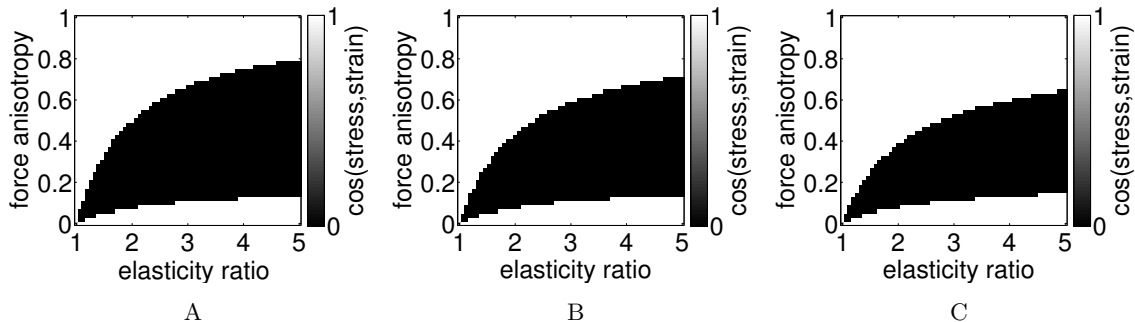

Figure S2: **Poisson ratio analysis** Similar plot as Figure 3A for different values for Poisson ratio (A)  $\nu = 0$ , (B)  $\nu = 0.2$ , (C)  $\nu = 0.4$ . In the force/material anisotropy space the region where principal directions of stress and strain are perpendicular is larger for lower values of Poisson ratio
