# Supplementary material for: Stress and Strain Provide Positional and Directional Cues in Development
Source: PubMed Central journal article supplement (PMC3886884; doi:10.1371/journal.pcbi.1003410), 2014-01-09
Supplement: pcbi.1003410.s003.pdf [file pcbi.1003410.s003.pdf]

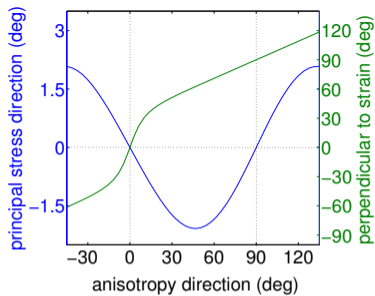

Figure S3: **Fixed points of dynamical stress/strain based feedback updates of anisotropy direction.** For the quadrilateral patch of anisotropic material with constant transverse and longitudinal Young modulus as  $Y_T = 400kPa$  and  $Y_L = 1200kPa$  respectively and Poisson coefficient = 0.2 under anisotropic loading  $F_x = 8kN$  and  $F_y = 4kN$  the direction of principal stress and perpendicular to the direction of principal strain are plotted versus the angle of varying anisotropy direction. 0 value for the angles is corresponding with maximal force direction. There is a fixed point at zero for both feedback systems which is stable for stress feedback whereas extremely unstable for the perpendicular to maximal strain feedback.
