# Supplementary material for: Stress and Strain Provide Positional and Directional Cues in Development
Source: PubMed Central journal article supplement (PMC3886884; doi:10.1371/journal.pcbi.1003410), 2014-01-09
Supplement: pcbi.1003410.s004.pdf [file pcbi.1003410.s004.pdf]

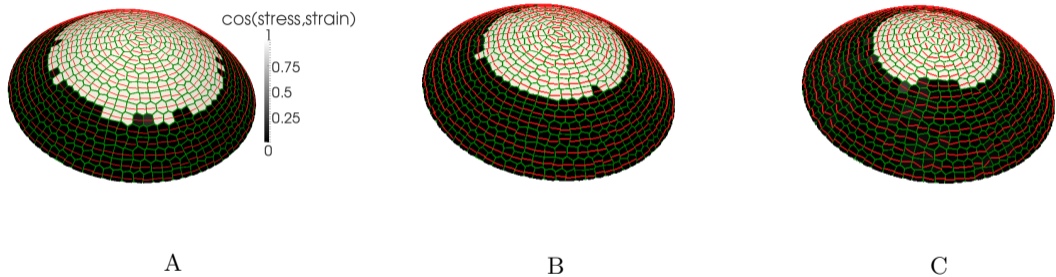

Figure S4: **Different zonation resulting from fiber model with different values for the  $K$  parameter.** (A)  $K = 0.5$ , (B)  $K = 0.45$ , (C)  $K = 0.4$ .
