# Supplementary material for: Stress and Strain Provide Positional and Directional Cues in Development
Source: PubMed Central journal article supplement (PMC3886884; doi:10.1371/journal.pcbi.1003410), 2014-01-09
Supplement: pcbi.1003410.s005.pdf [file pcbi.1003410.s005.pdf]

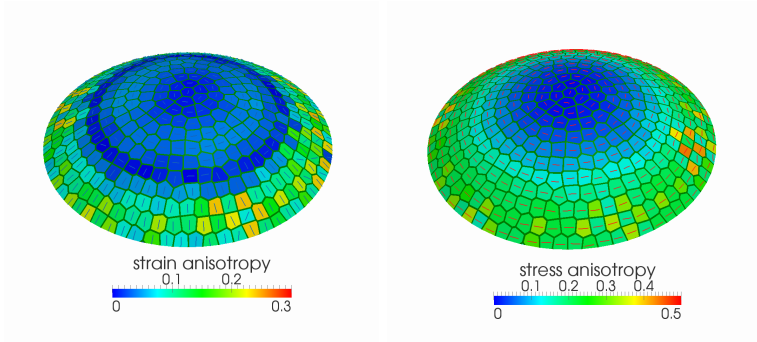

A

B

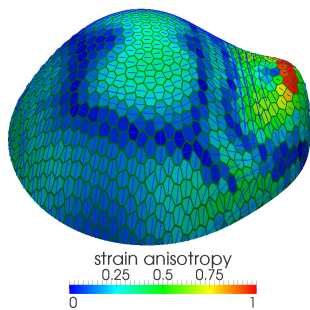

C

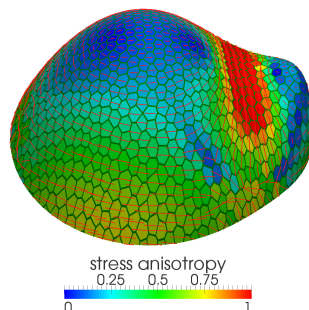

D

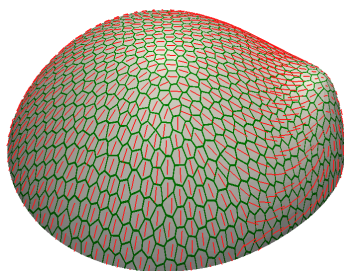

E

Figure S5: **Additional meristem-like template simulations.** (A-D) Additional information about Figure 4. (E) Anisotropy direction pattern for the same simulation as Figure 4D-F, using perpendicular to strain feedback model and the fiber model with strain anisotropy measure. All of the model parameters are the same except strain constant in Equation 6,  $S_{max} = 0.08$
